# Supplementary material
Source: PubMed Central journal article supplement (PMC7407328)

## Supplementary Online Content

Marston NA, Bonaca MP, Jarolim P, et al. Clinical application of high-sensitivity troponin testing in the atherosclerotic cardiovascular disease framework of the current cholesterol guidelines. *JAMA Cardiol*. Published online August 5, 2020.  
doi:10.1001/jamacardio.2020.2981

**eTable 1.** Baseline Characteristics in the Biomarker Cohort Compared to the Overall Trial Population

**eTable 2A.** Cardiovascular End Points Stratified by Baseline ASCVD Group

**eTable 2B.** Cardiovascular End Points Stratified by Baseline hsTnI

**eTable 3.** Cardiovascular End Points Stratified by Baseline ASCVD Group and hsTnI Level (ng/L)

**eTable 4.** Measures of Reclassification and Discrimination Improvement

**eTable 5.** Reclassification and Event Rates With hsTnI

**eFigure 1.** KM Rates for Primary End Point by hsTnI Category (>6 and ≤6 ng/L)

**eFigure 2.** Adjusted HR for the Primary End Point, MI, All-Cause Mortality, and Stroke Stratified by hsTnI Level

**eFigure 3.** Cardiovascular and Coronary Heart Death, MI, and Stroke by hsTnI Level (ng/L)

This supplementary material has been provided by the authors to give readers additional information about their work.

**eTable 1.** Baseline Characteristics in the Biomarker Cohort compared to the Overall Trial Population

|                                    | Overall Trial<br>(N=21162) | Biomarker Cohort<br>(N=8635) |
|------------------------------------|----------------------------|------------------------------|
| <b>Demographics</b>                |                            |                              |
| Age (yrs) median (IQR)             | 65 (59, 71)                | 65 (58, 71)                  |
| Age >= 65 y                        | 54.5                       | 53.0                         |
| Female                             | 23.9                       | 23.4                         |
| <b>Medical History</b>             |                            |                              |
| Prior MI                           | 100                        | 100                          |
| Hx of PAD                          | 5.4                        | 6.5                          |
| Prior Coronary Revascularization   | 84.1                       | 93.8                         |
| Diabetes Mellitus                  | 32.2                       | 29.8                         |
| Hypertension                       | 77.5                       | 78.3                         |
| Current Smoker                     | 16.7                       | 18.6                         |
| ApoB >=90 mg/dl despite statin     | 25.8                       | 23.7                         |
| Prior CHF                          | 20.0                       | 15.4                         |
| <b>Laboratory Values</b>           |                            |                              |
| eGFR <60 mL/min/1.73m <sup>2</sup> | 23.2                       | 23.3                         |

*Data are presented as percentages unless otherwise stated.*

**eTable 2A.** Cardiovascular Endpoints Stratified by Baseline ASCVD Group

|                  | <b>Lower Risk ASCVD<br/>(N=1846)</b> | <b>Very-High Risk ASCVD<br/>(N=6789)</b> | <b>Log-Rank<br/>P-value</b> |
|------------------|--------------------------------------|------------------------------------------|-----------------------------|
| <b>Endpoint</b>  | <b>KM Failure Rate</b>               | <b>KM Failure Rate</b>                   |                             |
| Primary Endpoint | 5.0%                                 | 8.8%                                     | <0.0001                     |
| CV Death         | 0.9%                                 | 2.2%                                     | <0.0001                     |
| MI               | 3.7%                                 | 6.0%                                     | <0.0001                     |
| Stroke           | 0.6%                                 | 1.7%                                     | 0.0003                      |
| CHD Death        | 0.4%                                 | 1.3%                                     | 0.0007                      |
| All-Cause Death  | 1.6%                                 | 5.6%                                     | <0.0001                     |

CV, cardiovascular; CHD, coronary heart disease

**eTable 2B.** Cardiovascular Endpoints Stratified by Baseline hsTnl

|                  | <b>hsTnl &lt;2<br/>(N=920)</b> | <b>hsTnl 2-6<br/>(N=5028)</b> | <b>hsTnl &gt;6<br/>(N=2687)</b> | <b>P-Trend</b> |
|------------------|--------------------------------|-------------------------------|---------------------------------|----------------|
| <b>Endpoint</b>  | <b>KM Failure Rate</b>         | <b>KM Failure Rate</b>        | <b>KM Failure Rate</b>          |                |
| Primary Endpoint | 2.8%                           | 6.0%                          | 13.5%                           | <0.0001        |
| CV Death         | 0.0%                           | 1.2%                          | 4.1%                            | <0.0001        |
| MI               | 2.5%                           | 4.3%                          | 8.7%                            | <0.0001        |
| Stroke           | 0.3%                           | 1.0%                          | 2.8%                            | <0.0001        |
| CHD Death        | 0.0%                           | 0.6%                          | 2.3%                            | <0.0001        |
| All-Cause Death  | 0.8%                           | 3.0%                          | 6.8%                            | <0.0001        |

CV, cardiovascular; CHD, coronary heart disease

**eTable 3.** Cardiovascular Endpoints Stratified by Baseline ASCVD Group and hsTnI Level (ng/L)

| Endpoint            | Lower Risk ASCVD     |                     |         | Very-High Risk ASCVD |                      |         |
|---------------------|----------------------|---------------------|---------|----------------------|----------------------|---------|
|                     | hsTnI ≤6<br>(N=1429) | hsTnI >6<br>(N=417) | P-value | hsTnI <2<br>(N=614)  | hsTnI ≥2<br>(N=6175) | P-value |
|                     | KM Rate              | KM Rate             |         | KM Rate              | KM Rate              |         |
| Primary Endpoint    | 3.8%                 | 9.1%                | <.0001  | 2.7%                 | 9.4%                 | <.0001  |
| CV Death            | 0.7%                 | 1.7%                | .0033   | 0%                   | 2.4%                 | <.0001  |
| MI                  | 2.8%                 | 6.9%                | <.0001  | 2.2%                 | 6.3%                 | <.0001  |
| Stroke              | 0.6%                 | 0.6%                | 0.055   | 0.5%                 | 1.8%                 | <.0001  |
| CHD Death           | 0.4%                 | 0.2%                | 0.10    | 0.0%                 | 2.4%                 | <.0001  |
| All-Cause Mortality | 1.6%                 | 1.9%                | 0.002   | 0.7%                 | 5.0%                 | <.0001  |

CV, cardiovascular; CHD, coronary heart disease

**eTable 4.** Measures of Reclassification and Discrimination Improvement

| <b>The Addition of hsTnl to Guideline-derived Clinical ASCVD Risk</b> |                          |                               |
|-----------------------------------------------------------------------|--------------------------|-------------------------------|
| <b>Net Reclassification Index (NRI) (at event rate)</b>               | <b>0.15 (0.10-0.21)*</b> | <b>&lt;0.0001<sup>^</sup></b> |
| <b>Integrated Discrimination Improvement (IDI) Index</b>              | <b>0.03 (0.03-0.04)</b>  |                               |

<sup>^</sup>Likelihood ratio test for the difference between models with ASCVD risk groups only and ASCVD risk groups plus hsTnl

\* 95% Confidence interval is based on bootstrap resampling

**eTable 5.** Reclassification and Event Rates with hsTnI

| Guideline<br>Derived<br>ASCVD Risk | 3-Year KM Rate (N) |                        |                        | % Reclassified<br>with addition<br>of hsTn |
|------------------------------------|--------------------|------------------------|------------------------|--------------------------------------------|
|                                    | Overall            | Concordant<br>Troponin | Discordant<br>Troponin |                                            |
| Very High                          | 8.8% (6,789)       | 9.4% (6,175)           | 2.7% (614)             | 9.0%                                       |
| Lower                              | 5.0% (1,846)       | 3.8% (1,429)           | 9.1% (417)             | 22.6%                                      |

eFigure 1. KM Rates for Primary Endpoint by hsTnI category (>6 and ≤6 ng/L)

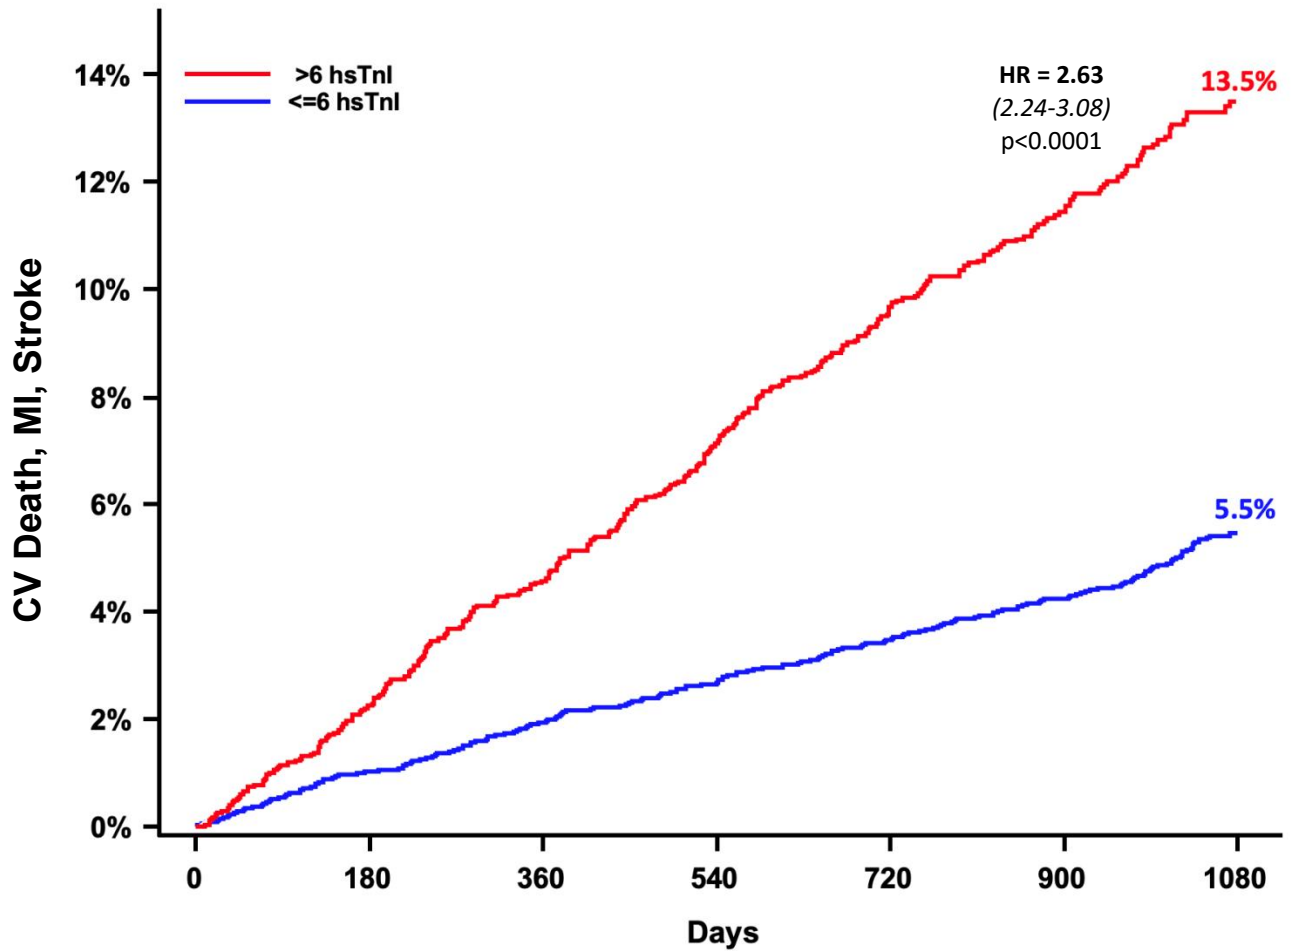

Number at risk:

|    |      |      |      |      |      |      |      |
|----|------|------|------|------|------|------|------|
| ≤6 | 5948 | 5852 | 5781 | 5570 | 4798 | 3663 | 2008 |
| >6 | 2687 | 2604 | 2529 | 2392 | 2068 | 1567 | 828  |

eFigure 2. Adjusted HR for the Primary Endpoint, MI, All-Cause Mortality, and Stroke stratified by hsTnI Level

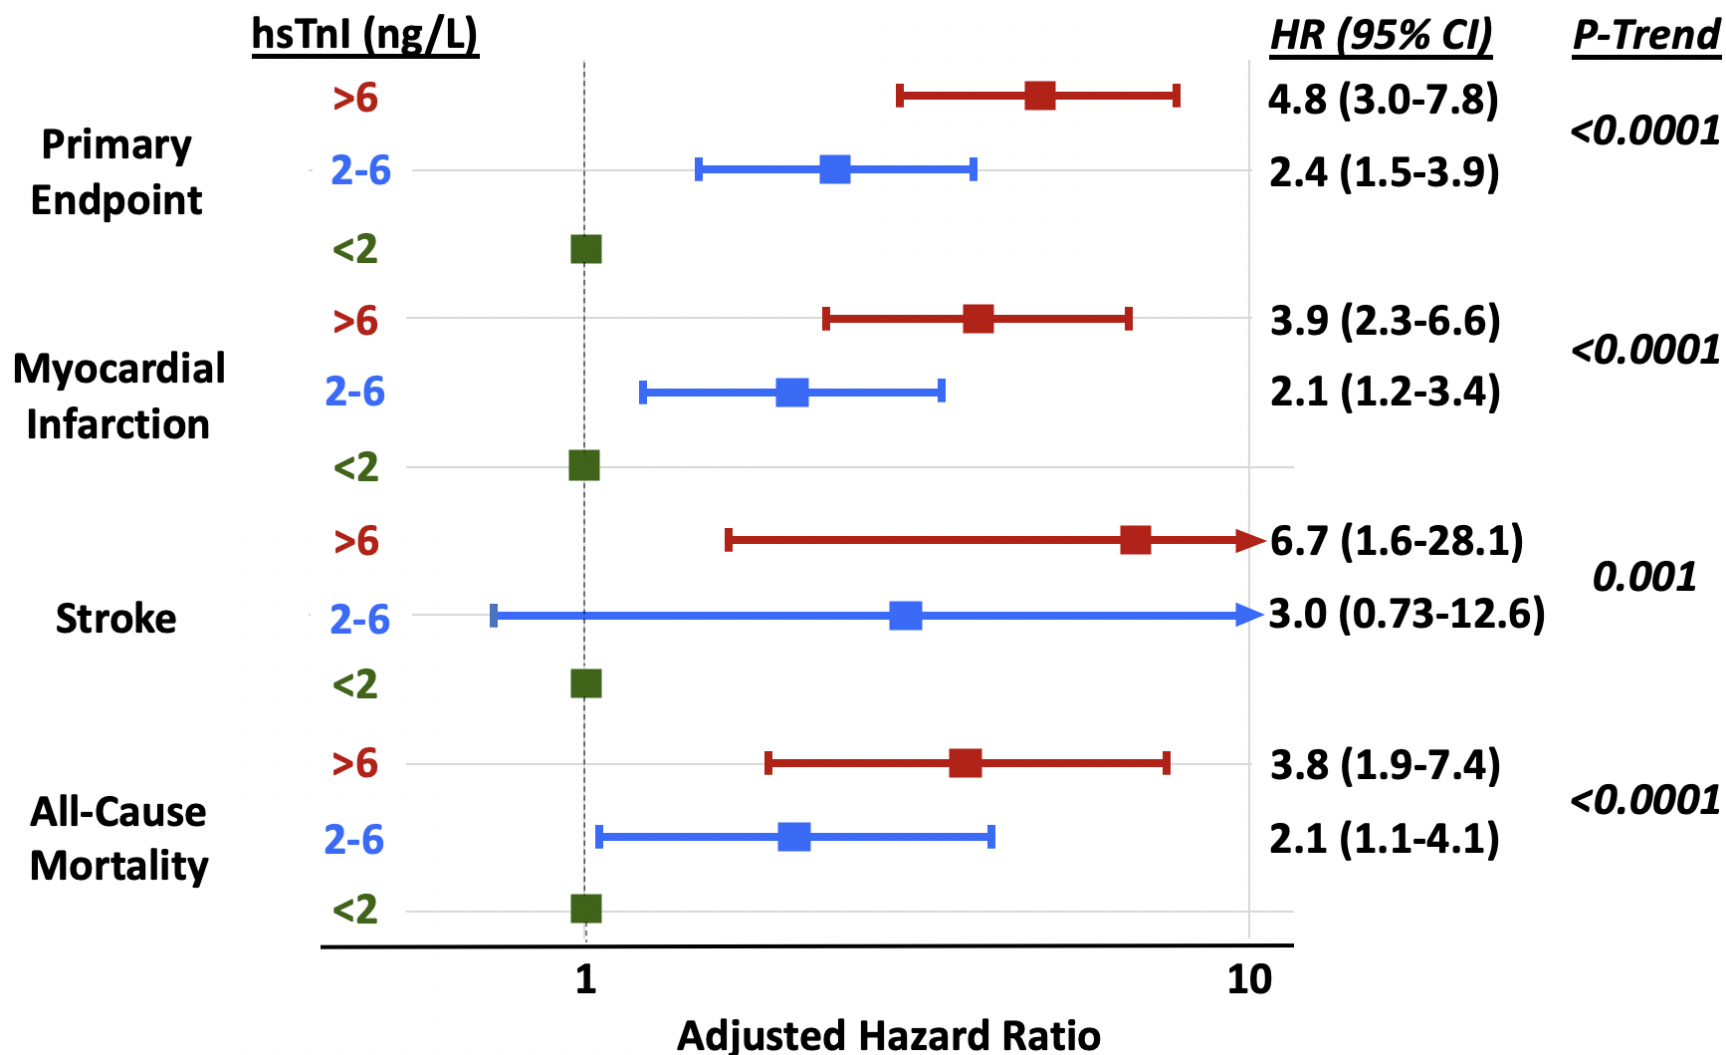

Adjusted for age, sex, diabetes, smoking, hypertension, apoB, stroke, CABG, peripheral artery disease, history of heart failure, and eGFR



eFigure 3. Cardiovascular and Coronary Heart Death, MI, and Stroke by hsTnI Level (ng/L)

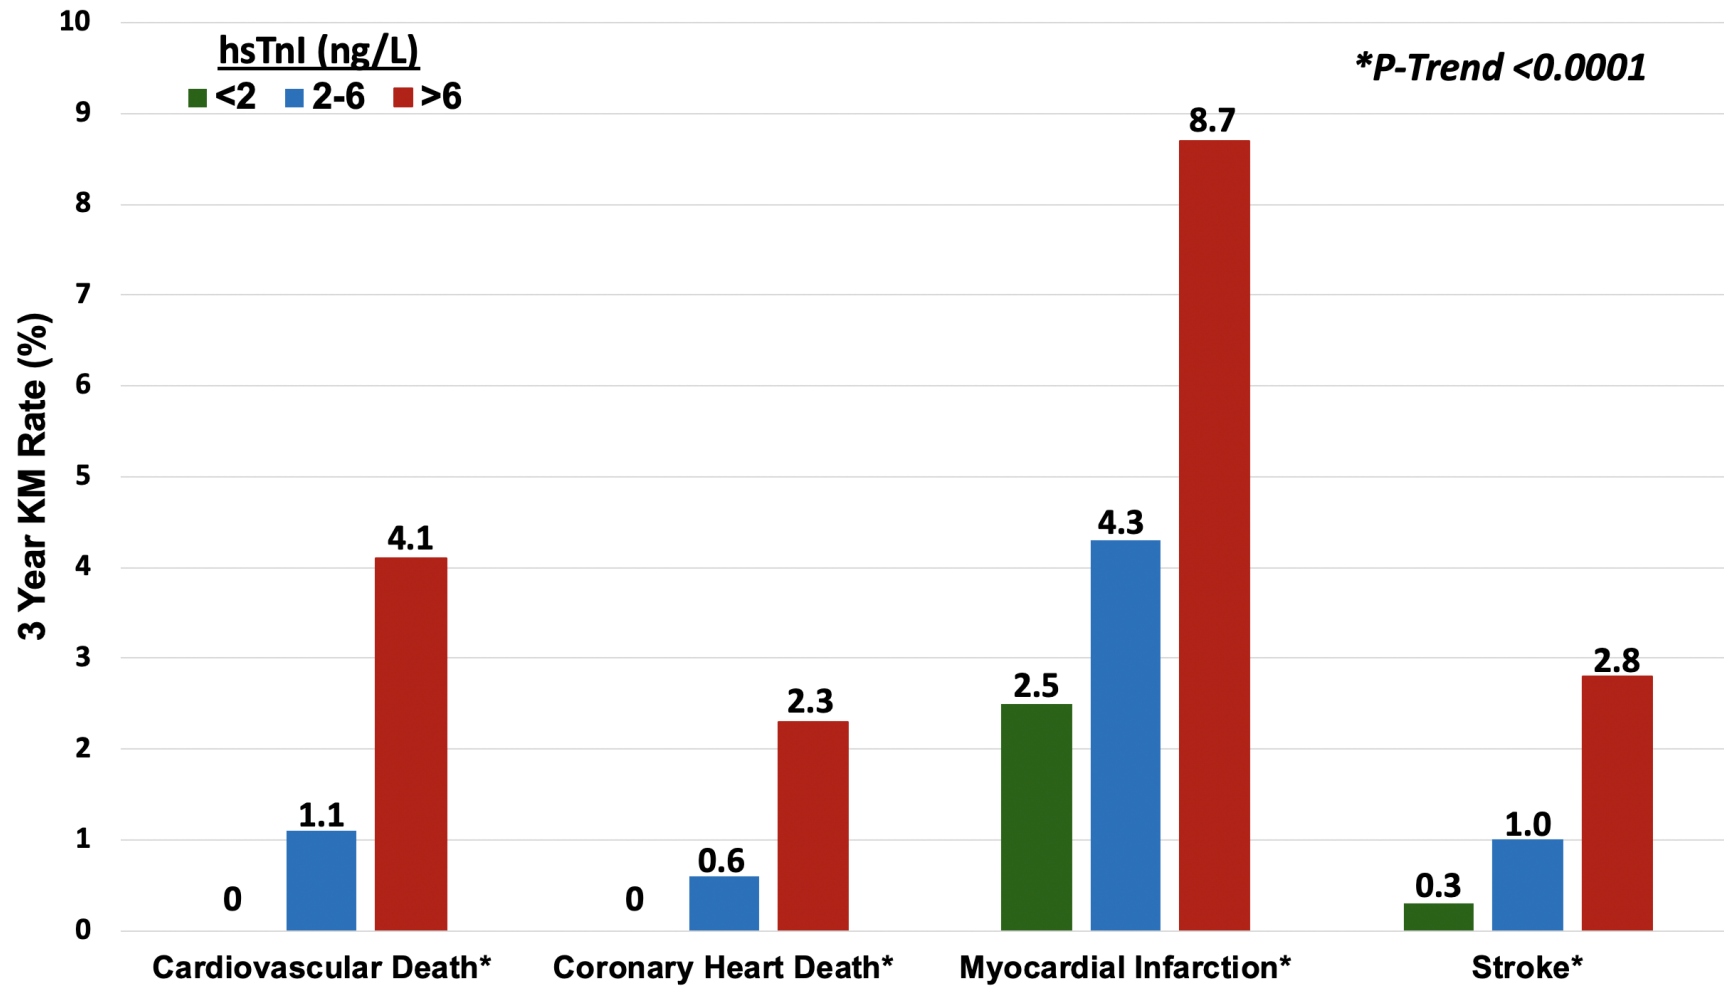

Supplement: jamacardiol-e202981-s001.pdf [file jamacardiol-e202981-s001.pdf]
